# Supplementary material for: Integration of Multiple Platforms for the Analysis of Multifluorescent Marking Technology Applied to Pediatric GBM and DIPG
Source: Int J Mol Sci. 2020 Sep 15;21(18):6763. doi: 10.3390/ijms21186763 (PMC7555235; doi:10.3390/ijms21186763)
Supplement: Supplementary file 1 [file ijms-21-06763-s001.zip]

Archive with 4 entries (4 files):
- ijms-901129-si.pdf
- video 1_clone 1D3 alone.mp4
- video 2_clone 5E2 alone.mp4
- video 3_cocolture 1D3+5E2.mp4
